# Supplementary material for: Humidity May Modify the Relationship between Temperature and Cardiovascular Mortality in Zhejiang Province, China
Source: PubMed Central journal article supplement (PMC5708022; doi:10.3390/ijerph14111383), 2017-11-14
Supplement: ijerph-14-01383-s001.pdf [file ijerph-14-01383-s001.pdf]

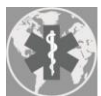

# Supplemental Materials: Humidity may modify the relationship between temperature and cardiovascular mortality in Zhejiang Province, China

Jie Zeng <sup>1,†</sup>, Xuehai Zhang <sup>2,†</sup>, Jun Yang <sup>3</sup>, Junzhe Bao <sup>1</sup>, Hao Xiang <sup>4</sup>, Keith Dear <sup>5</sup>, Qiyong Liu <sup>6</sup>, Shao Lin <sup>7</sup>, Wayne R. Lawrence <sup>7</sup>, Aihua Lin <sup>1,\*</sup> and Cunrui Huang <sup>1,\*</sup>

## OUTLINE

| Title                                                                                                                                                                                                              | Page |
|--------------------------------------------------------------------------------------------------------------------------------------------------------------------------------------------------------------------|------|
| Supplementary Table S1: The attributable fractions of CVD mortality due to cold and hot effects over lag 0-21 days stratified by low and high levels of humidity in 11 cities of Zhejiang province, China.         | 2    |
| Supplementary Table S2: Sensitivity analyses of attributable fractions for CVD mortality due to cold and hot effects by changing knots, lag and degrees of freedom (df) for the model.                             | 3    |
| Supplementary Figure S1: The lag-response relation associated with cold temperature (2.5th percentile versus minimum-mortality temperature) over lag 0-21 days on CVD mortality in 11 cities of Zhejiang province. | 4    |
| Supplementary Figure S2: The lag-response relation associated with hot temperature (97.5th percentile versus minimum-mortality temperature) over lag 0-21 days on CVD mortality in 11 cities of Zhejiang province. | 5    |
| Supplementary Figure S3: The residual variation scatter plots over time for main model in daily deaths after controlling seasonal and long-term trend of 11 cities in Zhejiang province.                           | 6    |

**Table S1.** The attributable fractions of CVD mortality due to cold and hot effects over lag 0-21 days stratified by low and high levels of humidity in 11 cities of Zhejiang province, China.

| City     | Humidity level | MMT(°C) | Attributable fraction(% ,95%empirical CI) |                      |                      |
|----------|----------------|---------|-------------------------------------------|----------------------|----------------------|
|          |                |         | Total                                     | Cold                 | Hot                  |
| Hangzhou | Low-humidity   | 32.70   | 18.06 (-35.64,44.28)                      | 17.82 (-36.87,45.33) | 0.25 (-1.18,1.03)    |
|          | High-humidity  | 30.19   | 24.77 (-42.84,30.77)                      | 24.88 (-40.05,31.11) | -0.11 (-0.87,0.22)   |
| Huzhou   | Low-humidity   | 29.20   | 31.03 (-27.14,49.43)                      | 30.47 (-30.20,49.89) | 0.56 (-0.30,1.02)    |
|          | High-humidity  | 29.92   | 40.21 (-17.56,50.21)                      | 40.11 (-15.68,52.11) | -0.11(-2.03,0.41)    |
| Jiaxing  | Low-humidity   | 33.54   | 38.18 (-17.13,40.58)                      | 38.15 (-20.65,44.59) | 0.03 (-0.64,0.44)    |
|          | High-humidity  | 30.00   | 40.14 (-18.28,51.22)                      | 39.92 (-3.21,48.22)  | -0.22 (-0.88,0.09)   |
| Jinhua   | Low-humidity   | 18.30   | 14.70 (-4.21,45.03)                       | 7.47 (-4.48,36.80)   | 7.22 (-11.49,18.78)  |
|          | High-humidity  | 14.20   | 10.79 (-20.11,30.11)                      | 1.88 (-1.02,3.69)    | 8.92 (-21.22,13.21)  |
| Lishui   | Low-humidity   | 28.28   | 23.69 (-29.97,48.92)                      | 19.58 (-35.82,45.47) | 4.10 (-1.33,7.43)    |
|          | High-humidity  | 14.84   | 27.67 (-12.12,40.22)                      | 11.70 (-1.55,20.32)  | 15.97 (-20.72,30.47) |
| Ningbo   | Low-humidity   | 18.12   | 13.65 (2.28,20.87)                        | 9.51 (-3.07,17.99)   | 4.13 (-7.60,12.26)   |
|          | High-humidity  | 29.90   | 30.22 (-8.95,40.22)                       | 30.41 (3.57,39.99)   | -0.19 (-0.59,0.06)   |
| Quzhou   | Low-humidity   | 17.67   | 13.95 (-1.22,22.54)                       | 7.10 (-2.29,13.67)   | 6.84 (-12.84,19.04)  |
|          | High-humidity  | 28.90   | 28.42 (-12.22,40.22)                      | 28.56 (-14.33,38.23) | -0.14 (-0.83,0.20)   |
| Shaoxing | Low-humidity   | 31.42   | 17.42 (-24.65,41.64)                      | 16.64 (-25.13,39.45) | 0.78 (-0.82,1.70)    |
|          | High-humidity  | 29.61   | 35.22 (8.01,40.22)                        | 35.48 (6.80,42.12)   | -0.26 (-1.13,0.13)   |
| Taizhou  | Low-humidity   | 30.12   | 11.77 (-38.96,41.79)                      | 11.11 (-43.36,42.05) | 0.66 (-1.06,1.78)    |
|          | High-humidity  | 29.23   | 25.33 (-17.21,29.12)                      | 25.14 (-17.16,30.23) | 0.18 (-2.25,0.97)    |
| Wenzhou  | Low-humidity   | 23.40   | 15.79 (-36.41,40.41)                      | 12.59 (-34.37,38.92) | 3.20 (-7.04,9.23)    |
|          | High-humidity  | 14.27   | 6.14 (-12.21,22.40)                       | 1.50 (-13.73,10.35)  | 4.64 (-10.27,15.22)  |
| Zhoushan | Low-humidity   | 27.19   | 23.48 (-10.32,30.80)                      | 20.82 (-10.22,30.21) | 2.66 (-0.23,4.00)    |
|          | High-humidity  | 28.60   | 32.22 (12.96, 42.11)                      | 32.36 (4.28,40.18)   | -0.14 (-5.65,0.38)   |
| Overall  | Low-humidity   | 28.28   | 19.18 (3.43,25.64)                        | 16.74 (0.89,24.44)   | 2.44 (-0.62,4.38)    |
|          | High-humidity  | 29.23   | 34.28 (12.93,41.56)                       | 31.36 (14.79,38.41)  | 2.92 (-6.54,7.70)    |

Note: MMT, minimum-mortality temperature

**Table S2.** Sensitivity analyses of attributable fractions for CVD mortality due to cold and hot effects by changing knots, lag and degrees of freedom (df) for the model.

| Mo Model Choice                                     | Attributable fraction(% <i>,95%empirical CI)</i> |                     |                   | QAIC           |
|-----------------------------------------------------|--------------------------------------------------|---------------------|-------------------|----------------|
|                                                     | Total                                            | Cold                | Hot               |                |
| <b>Reference</b>                                    | 28.05 (21.94,32.38)                              | 27.47(21.77,31.81)  | 0.58 (0.19,0.91)  | <b>4552.10</b> |
| Knots for exposure-response:<br>25th- 50th and 75th | 23.03 (16.34,27.30)                              | 22.19 (15.75,26.51) | 0.83 (-0.70,1.99) | 4559.45        |
| Knots for exposure-response:<br>25th- 75th and 90th | 26.94 (20.31,31.00)                              | 26.15 (19.50,30.39) | 0.79 (-0.18,1.36) | 4557.76        |
| Lag period: 14 days                                 | 22.51 (16.16,26.92)                              | 21.80 (15.55,26.34) | 0.71 (0.37,0.98)  | 4575.61        |
| Lag period: 20 days                                 | 27.90 (21.56,32.04)                              | 27.27 (20.79,31.62) | 0.63 (0.19,0.95)  | 4563.59        |
| Lag period: 24 days                                 | 25.79 (18.20,30.70)                              | 25.11 (17.59,30.18) | 0.68 (-0.13,1.19) | 4552.14        |
| Df for year: 6                                      | 21.77 (16.06,25.93)                              | 21.35 (15.16,25.61) | 0.42 (-0.07,0.74) | 4556.85        |
| Df for year: 8                                      | 23.46 (16.07,28.49)                              | 22.45 (14.89,27.67) | 1.00 (-0.14,1.76) | 4570.85        |
| Df for year: 10                                     | 20.65 (8.85,26.90)                               | 18.42 (8.05,23.79)  | 2.23 (-2.60,4.70) | 4574.70        |
| Df for relative humidity: 4                         | 28.10 (21.72,32.34)                              | 27.52 (21.29,31.80) | 0.59 (0.17,0.92)  | 4564.21        |
| Df for relative humidity: 6                         | 28.10 (22.08,32.15)                              | 27.51 (21.08,31.65) | 0.59 (0.16,0.91)  | 4568.03        |
| Df for air pressure: 4                              | 28.10 (22.33,32.43)                              | 27.51 (21.64,31.72) | 0.59 (0.17,0.94)  | 4553.34        |
| Df for air pressure : 6                             | 27.67 (21.20,31.67)                              | 26.88 (20.84,31.11) | 0.58 (0.19,0.89)  | 4557.63        |
| Df for wind speed: 4                                | 27.81 (21.64,31.73)                              | 27.22 (20.63,31.57) | 0.59 (0.18,0.93)  | 4557.93        |
| Df for wind speed: 6                                | 27.62 (21.52,31.86)                              | 27.04 (20.71,31.02) | 0.59 (0.19,0.87)  | 4555.96        |

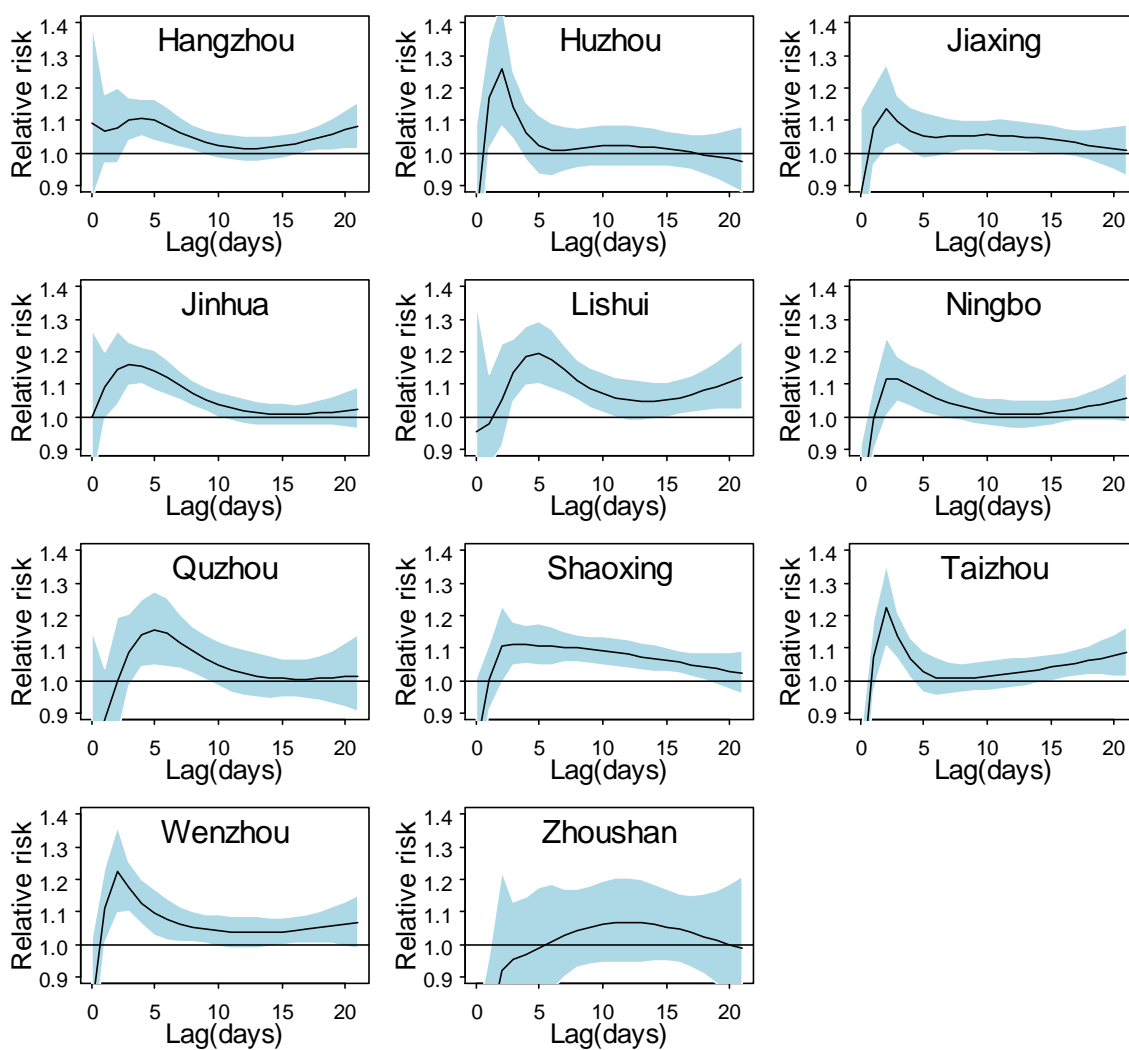

**Figure S1.** The lag-response relation associated with cold temperature (2.5th percentile versus minimum-mortality temperature) over lag 0–21 days on CVD mortality in 11 cities of Zhejiang province.

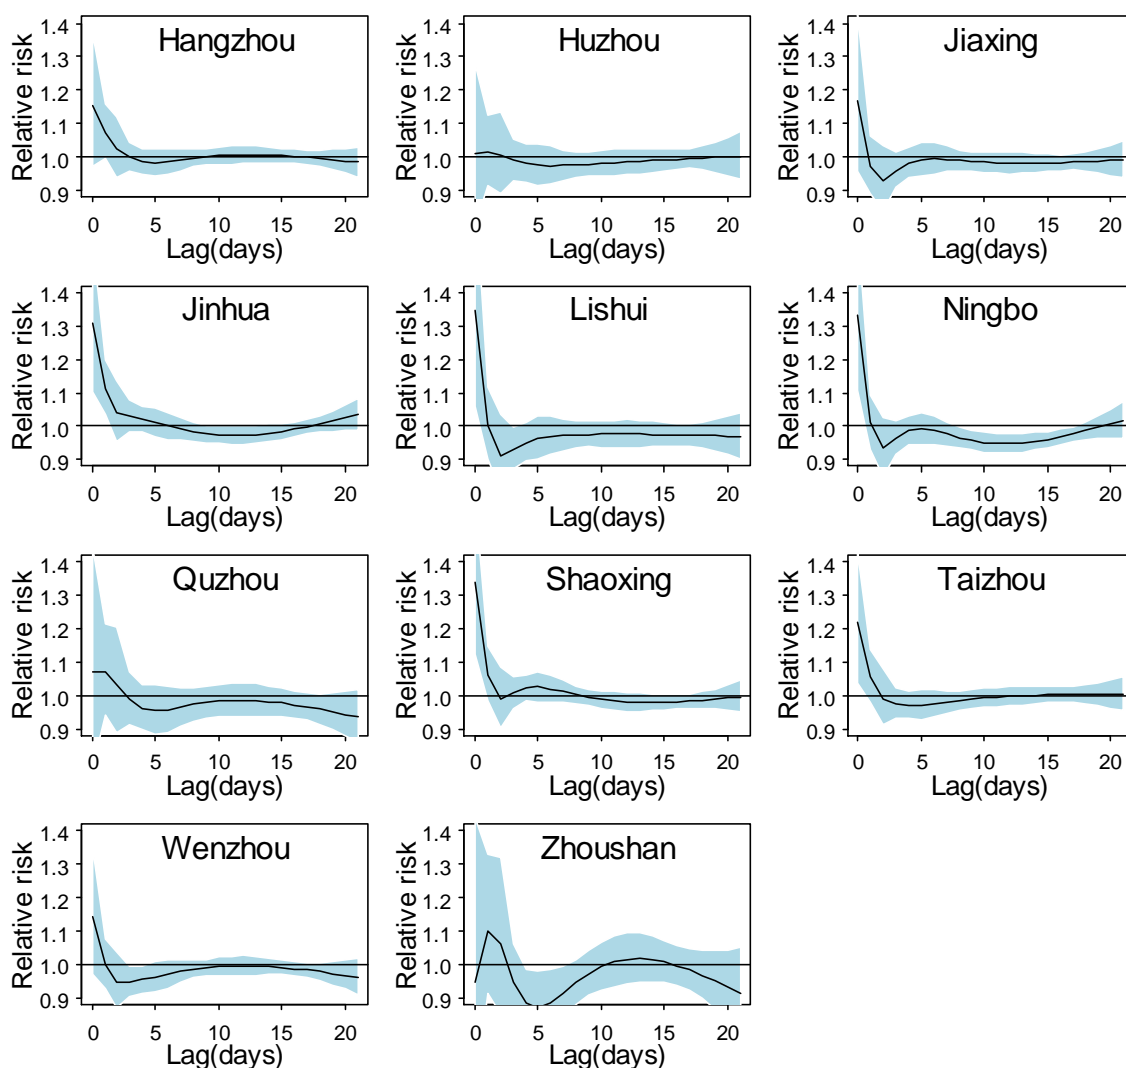

**Figure S2.** The lag-response relation associated with hot temperature (97.5th percentile versus minimum-mortality temperature) over lag 0–21 days on CVD mortality in 11 cities of Zhejiang province.

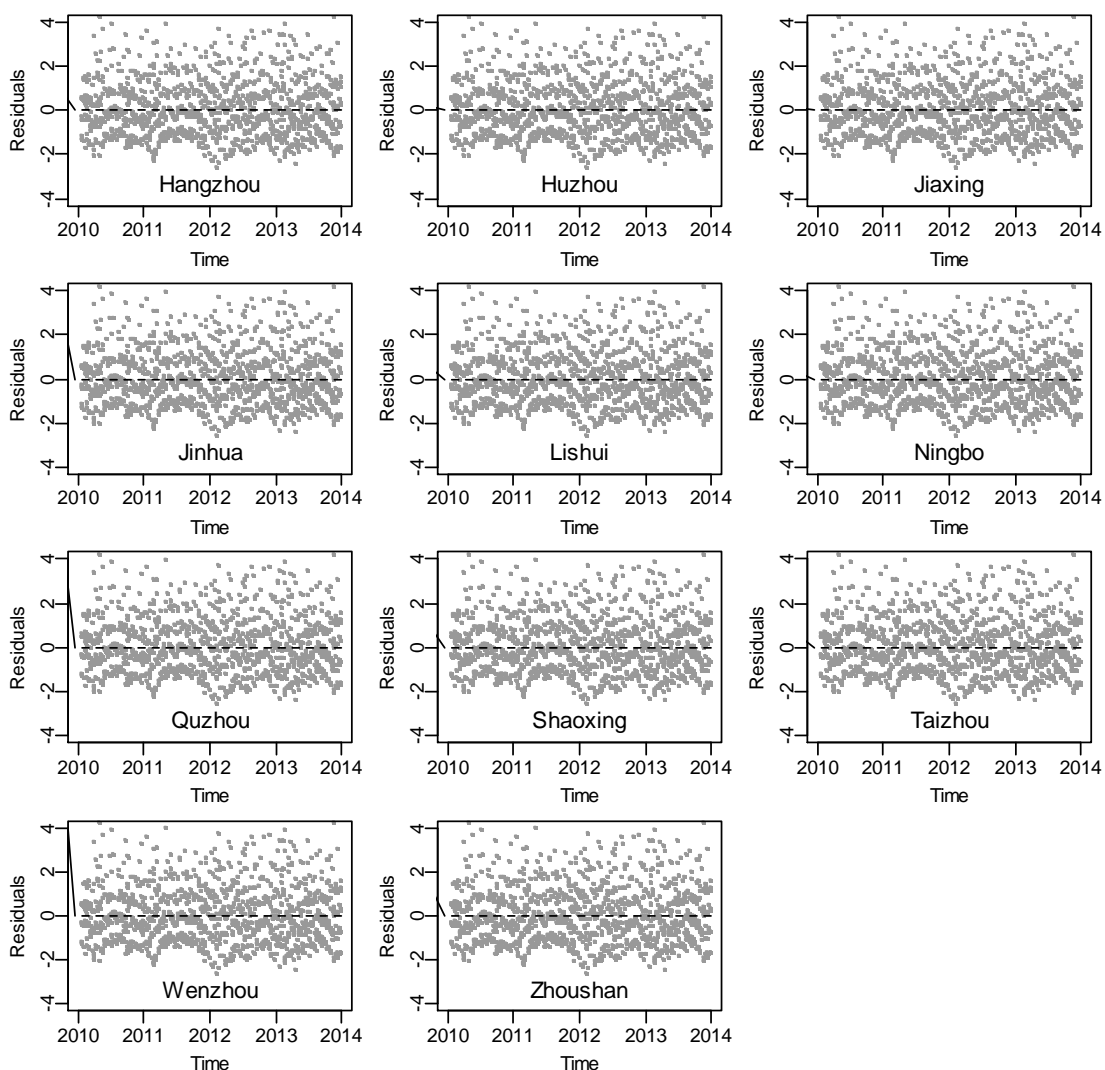

**Figure S3.** The residual variation scatter plots over time for main model in daily deaths after controlling seasonal and long-term trend of 11 cities in Zhejiang province.

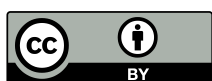

© 2017 by the authors. Submitted for possible open access publication under the terms and conditions of the Creative Commons Attribution (CC BY) license (<http://creativecommons.org/licenses/by/4.0/>).
